# Supplementary material
Source: Springer Nature journal article supplement (https://www.springermedizin.de/resource/supplementary/12885_2008_1290_MOESM4_ESM.pdf/9471662)

# MECA

Control

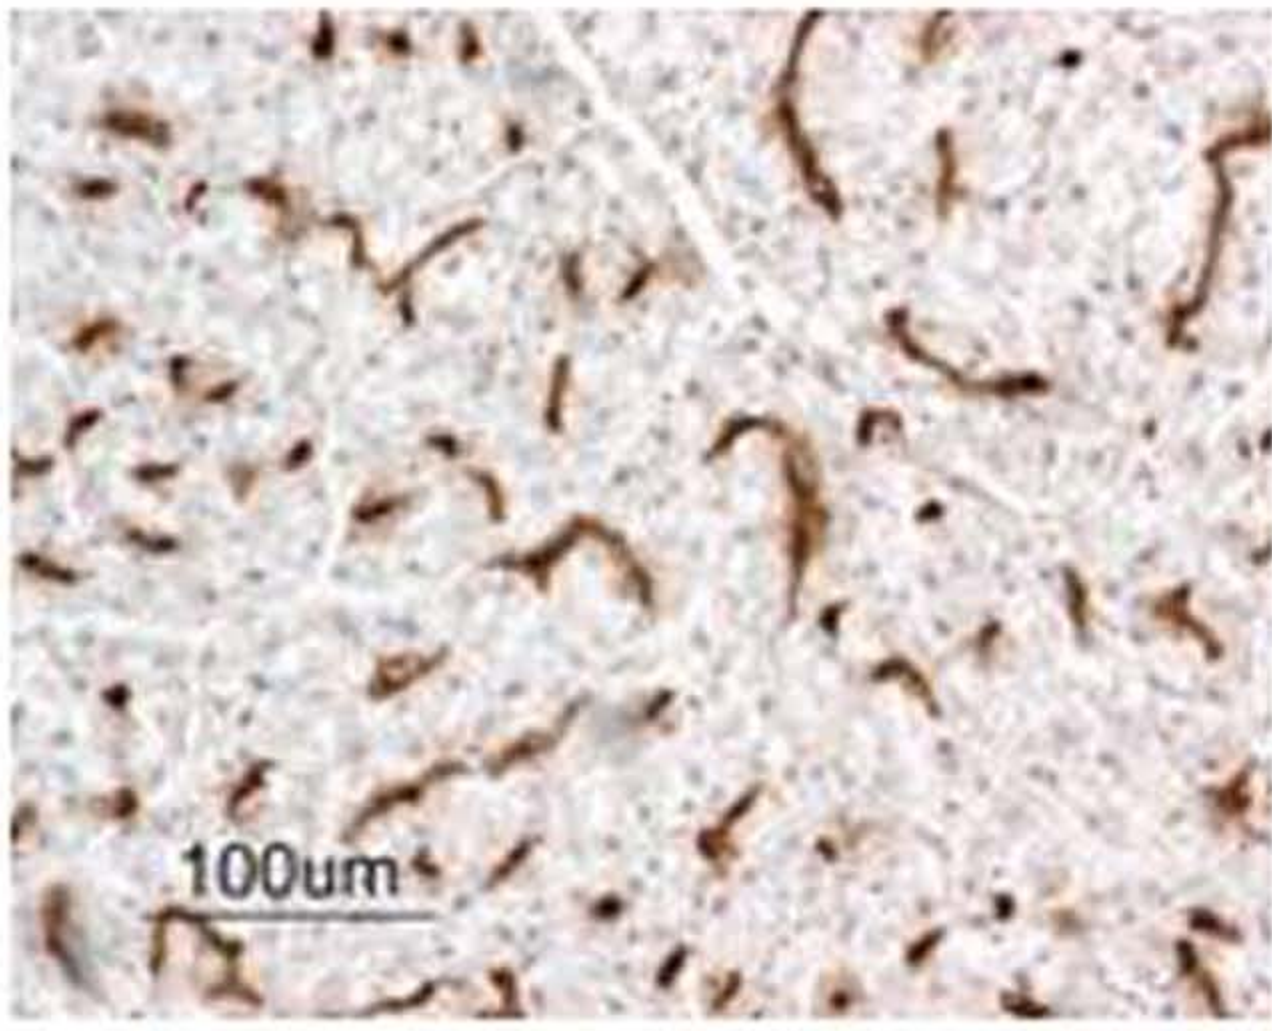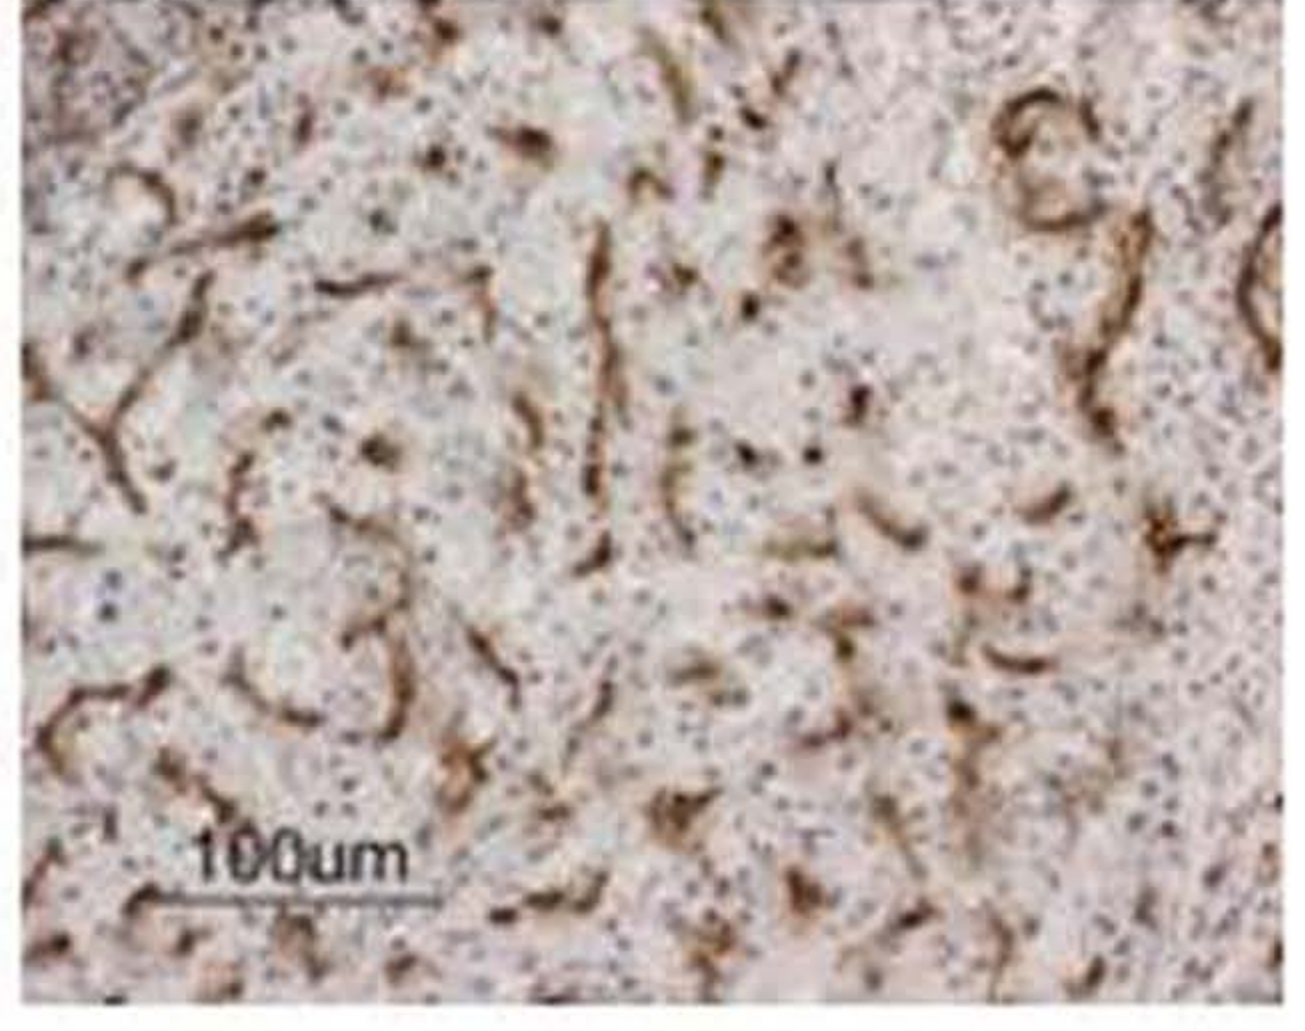

CT-322

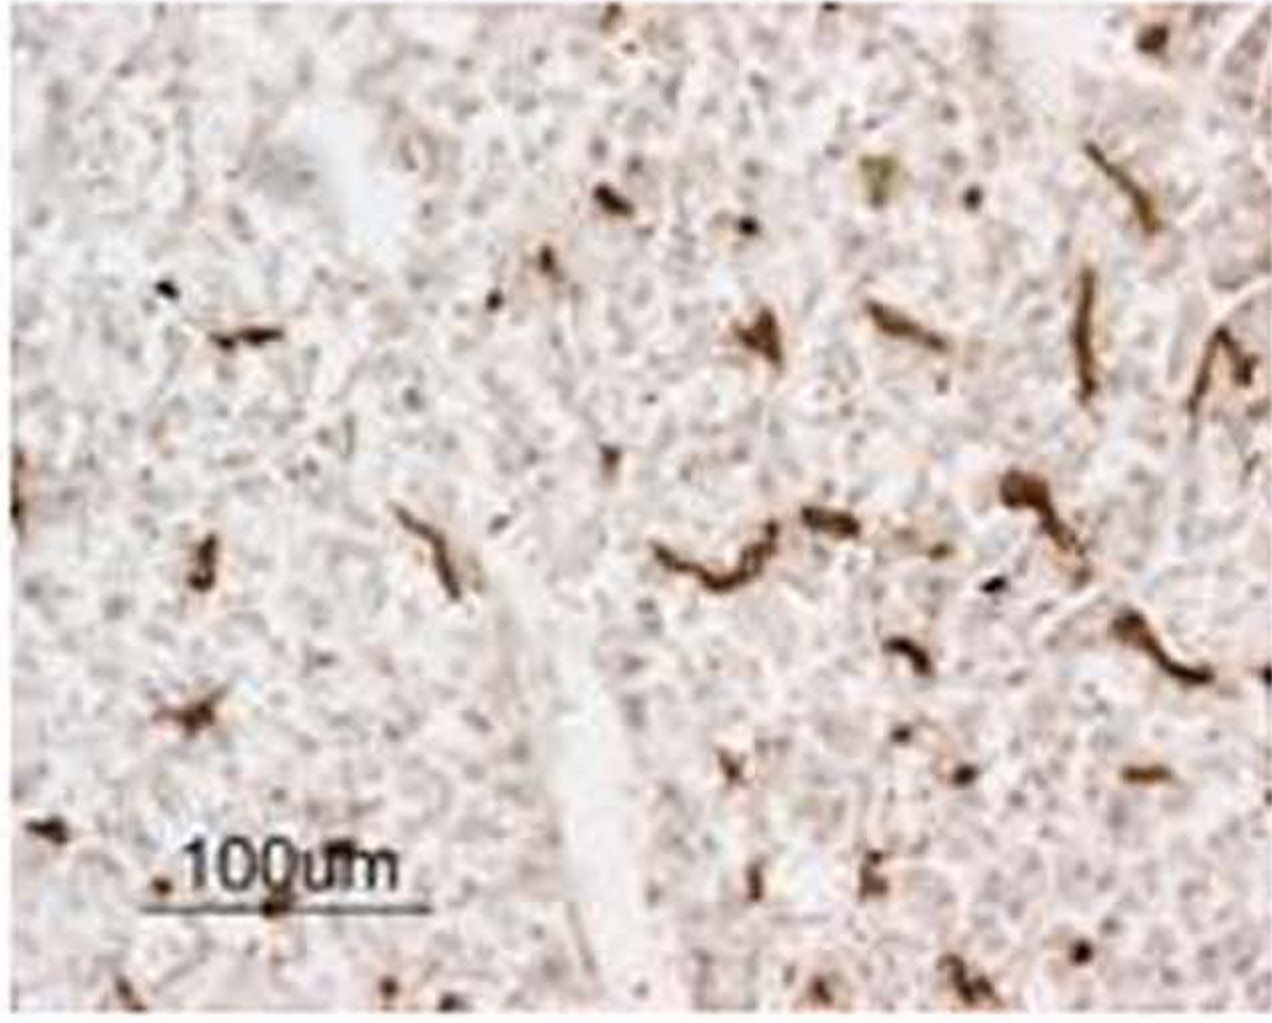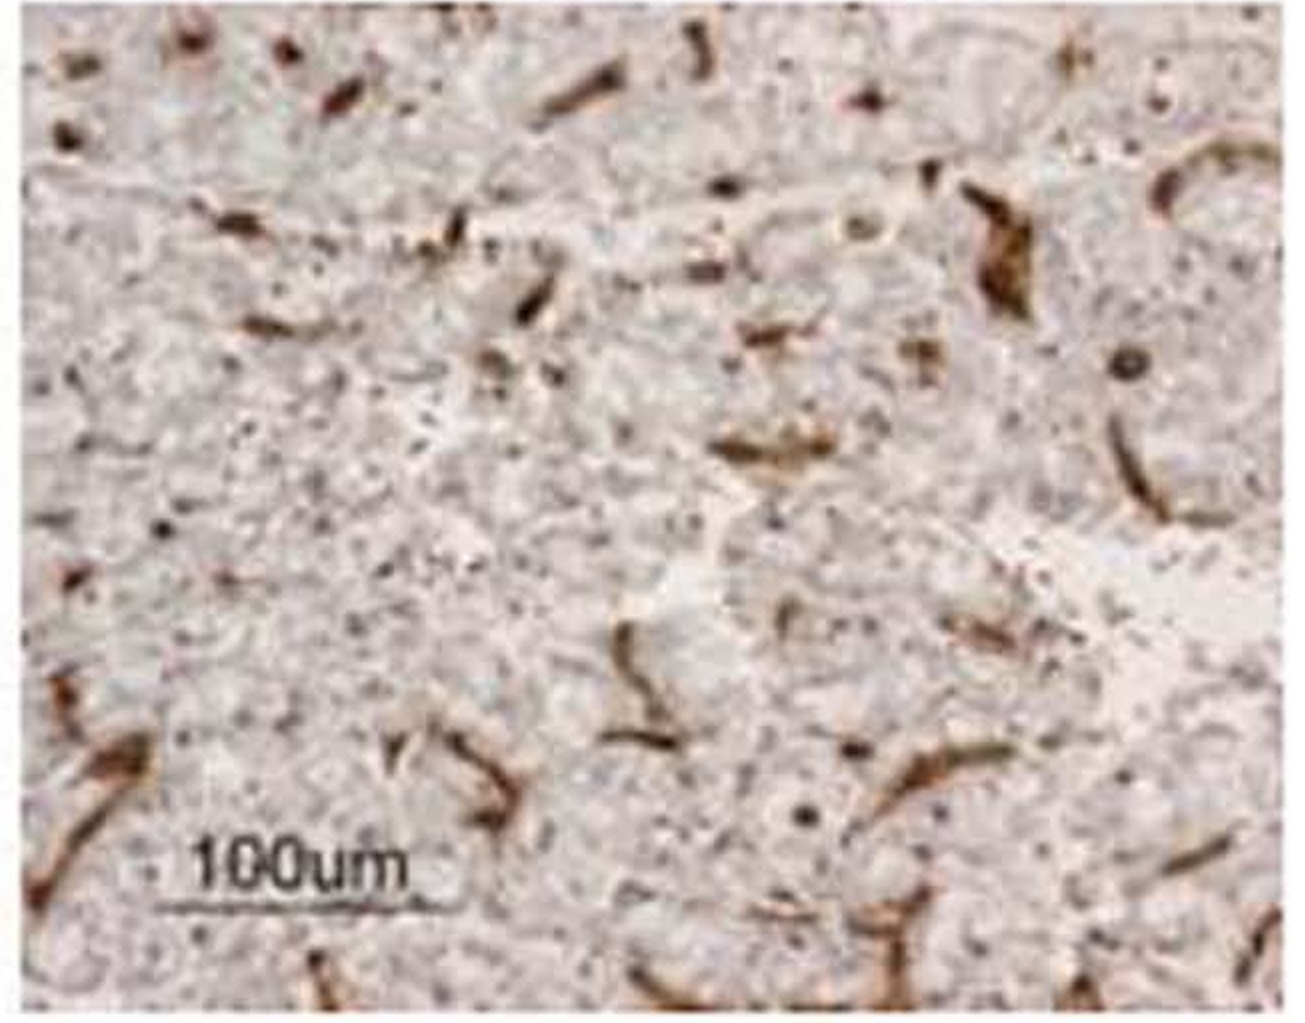

Gemzar

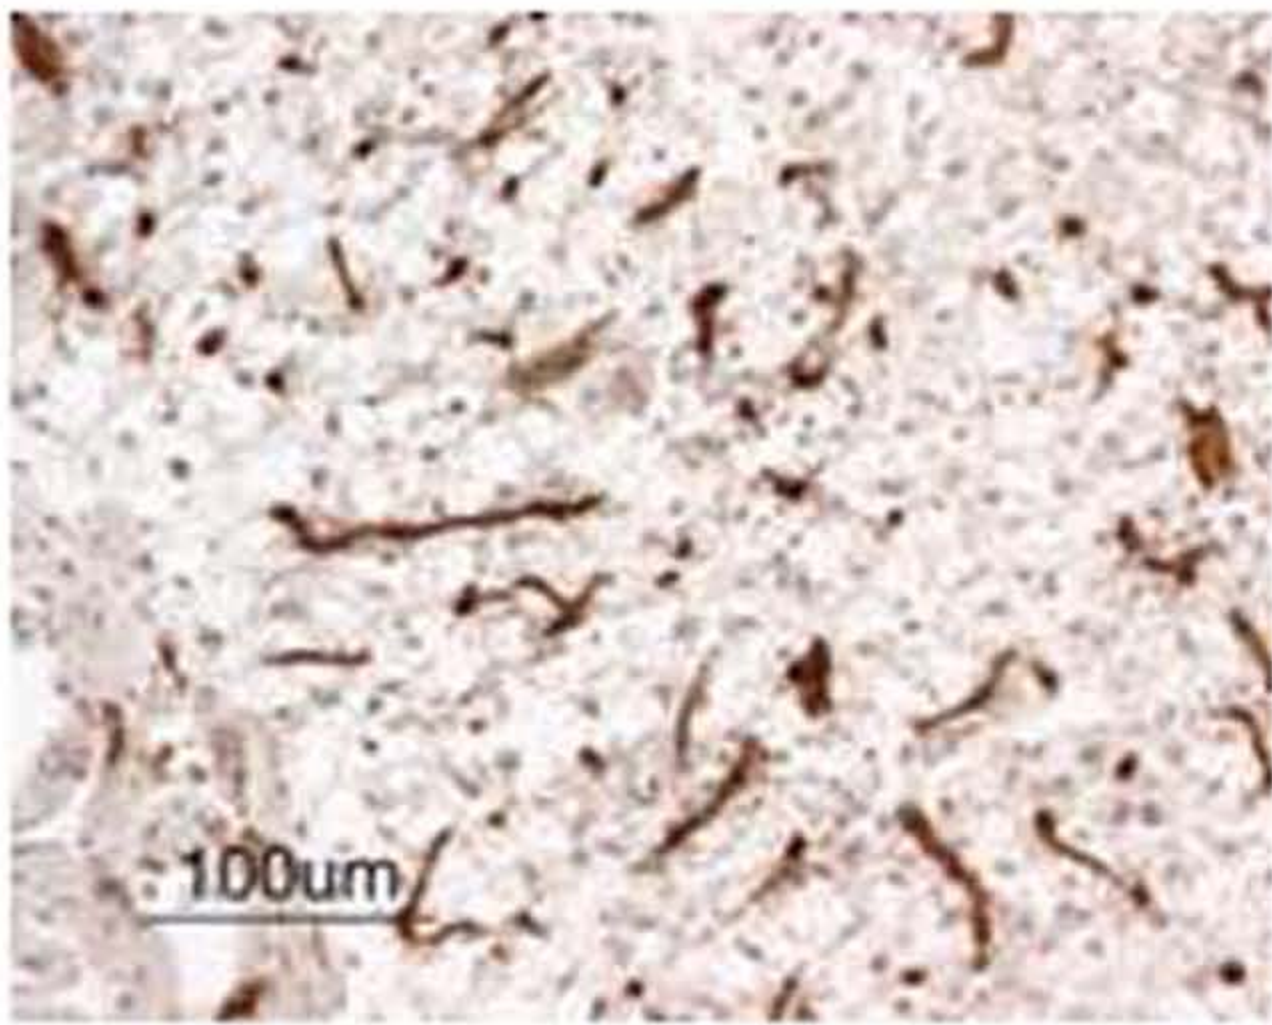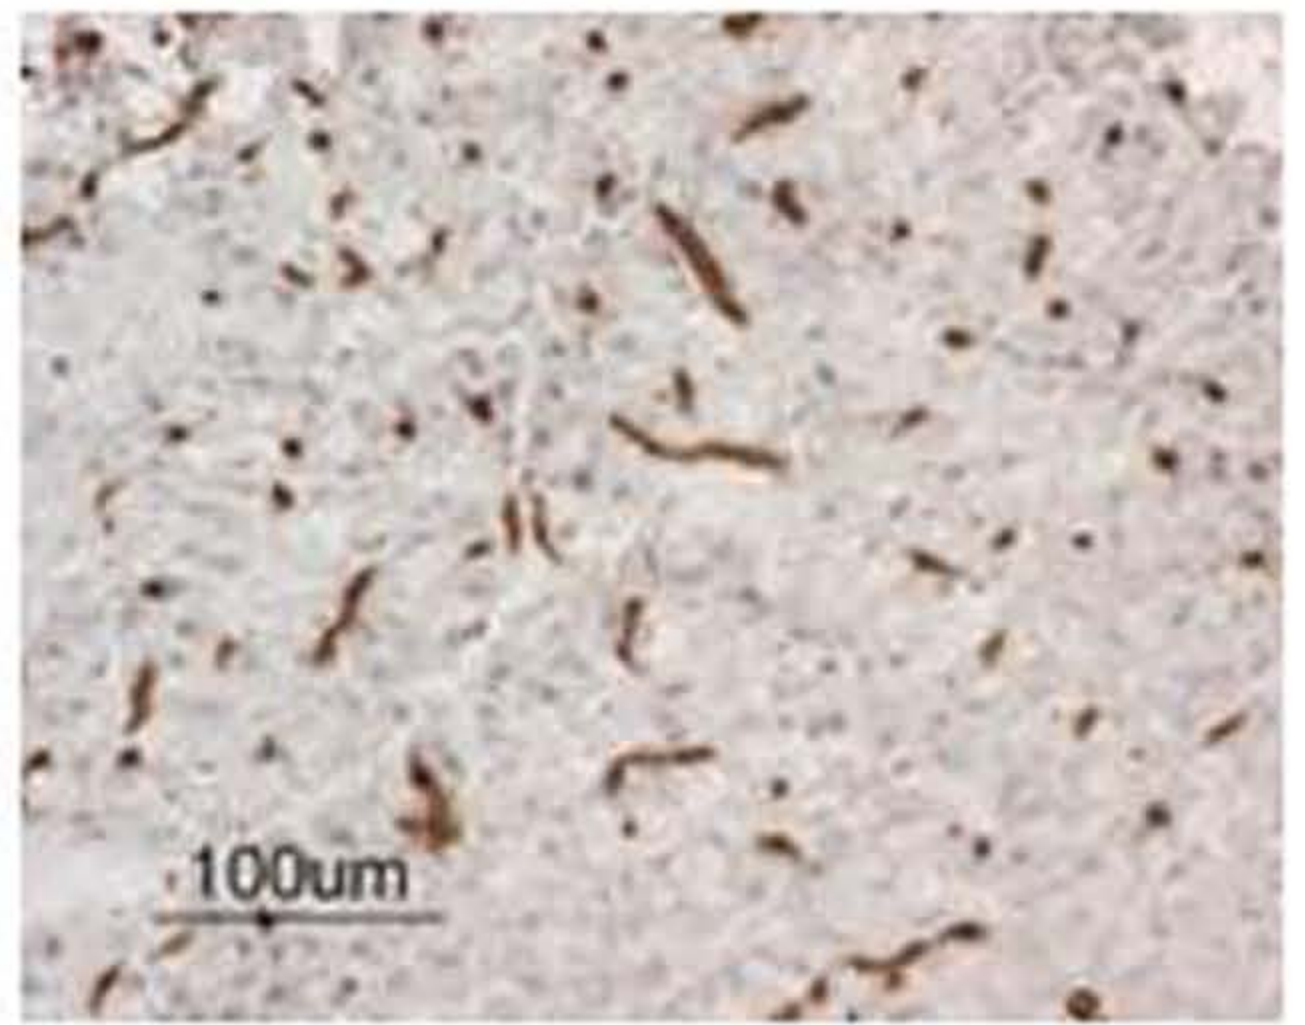

CT + GEM

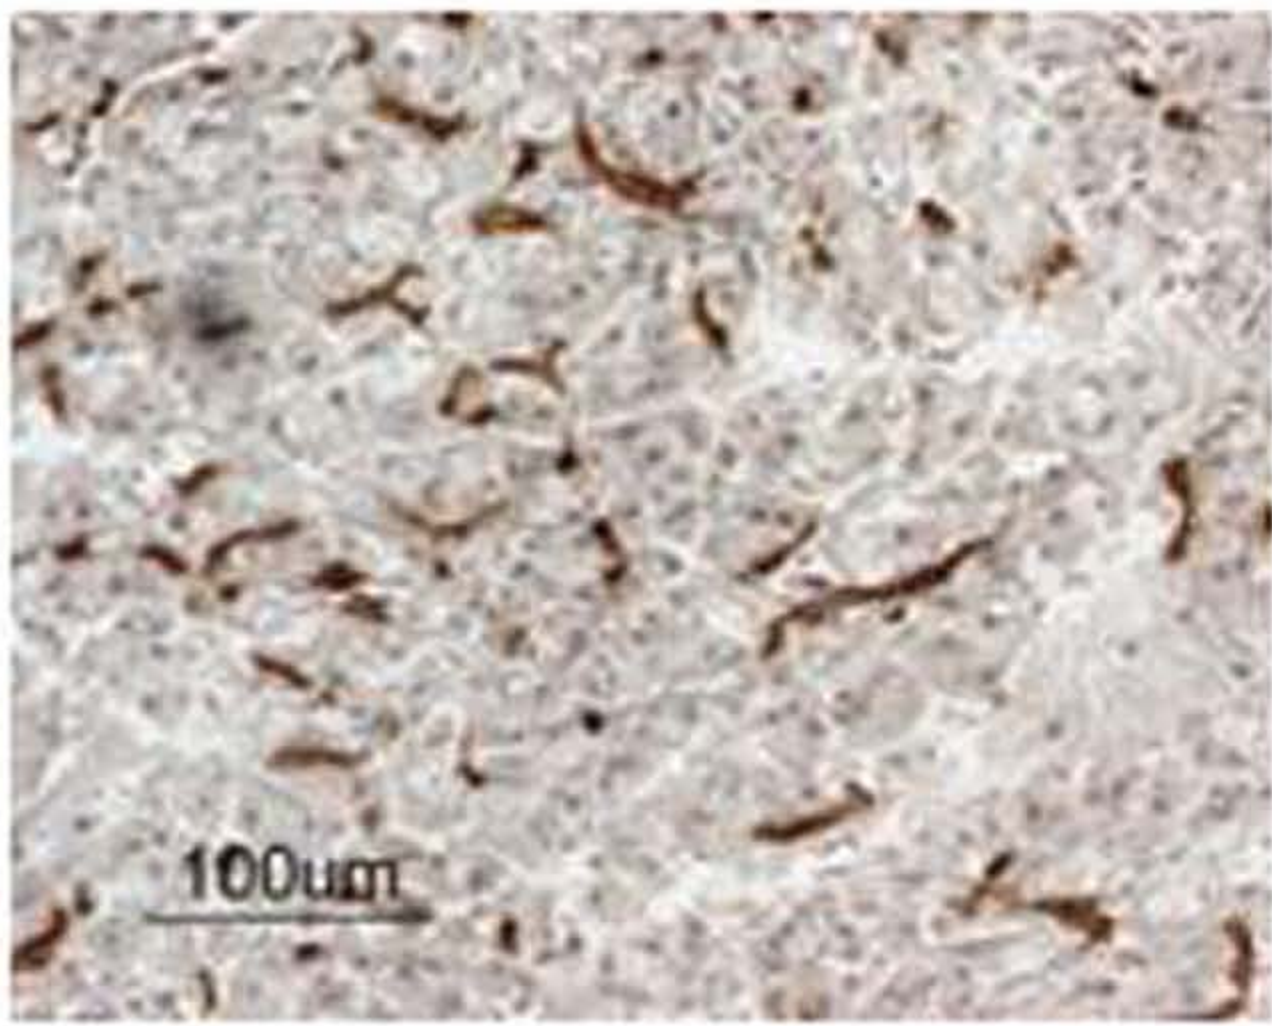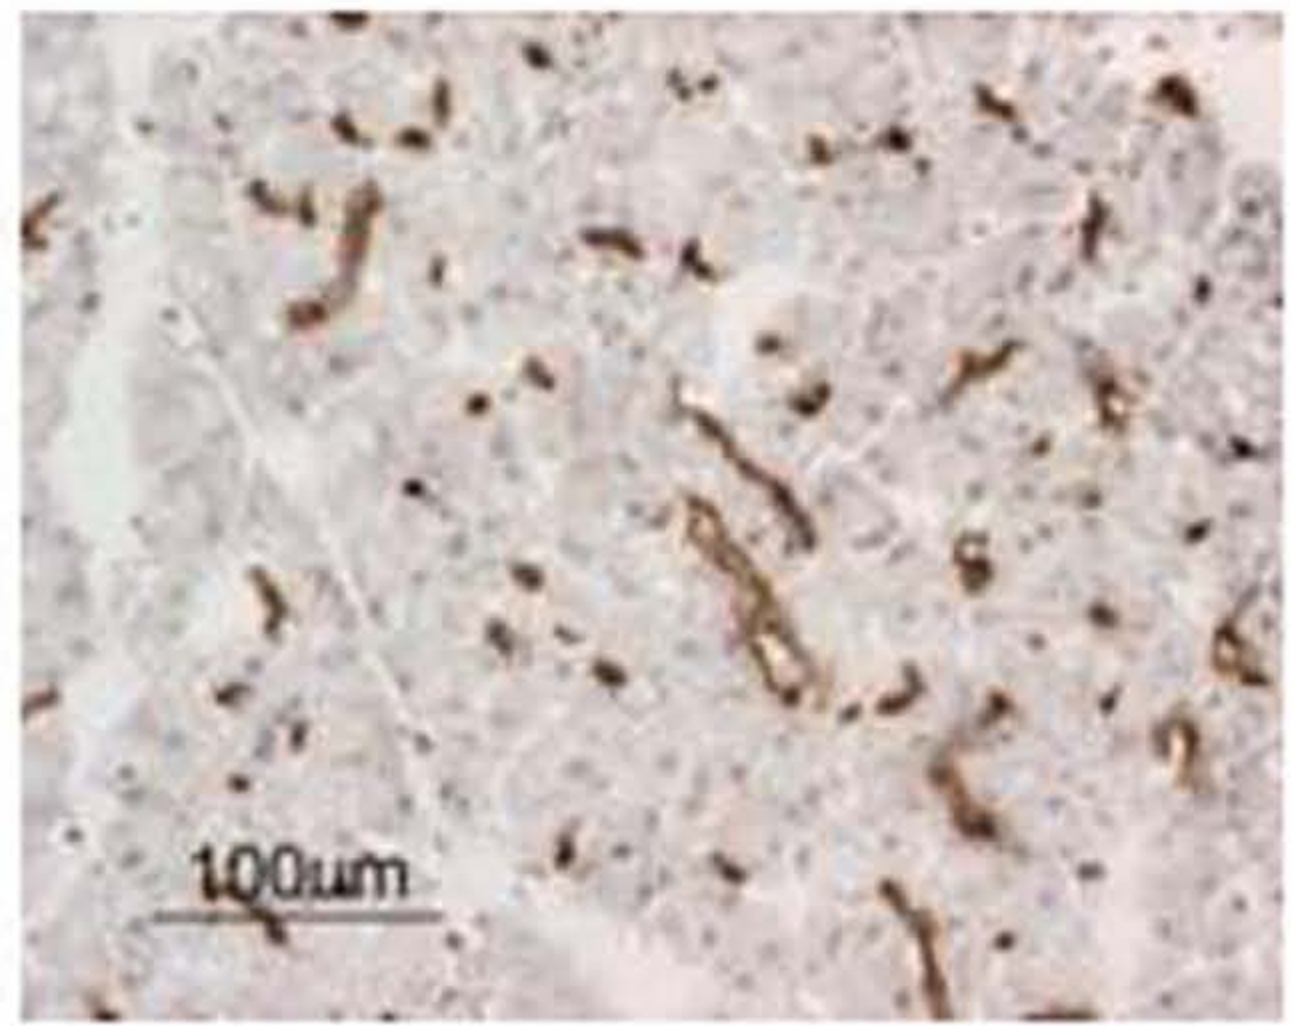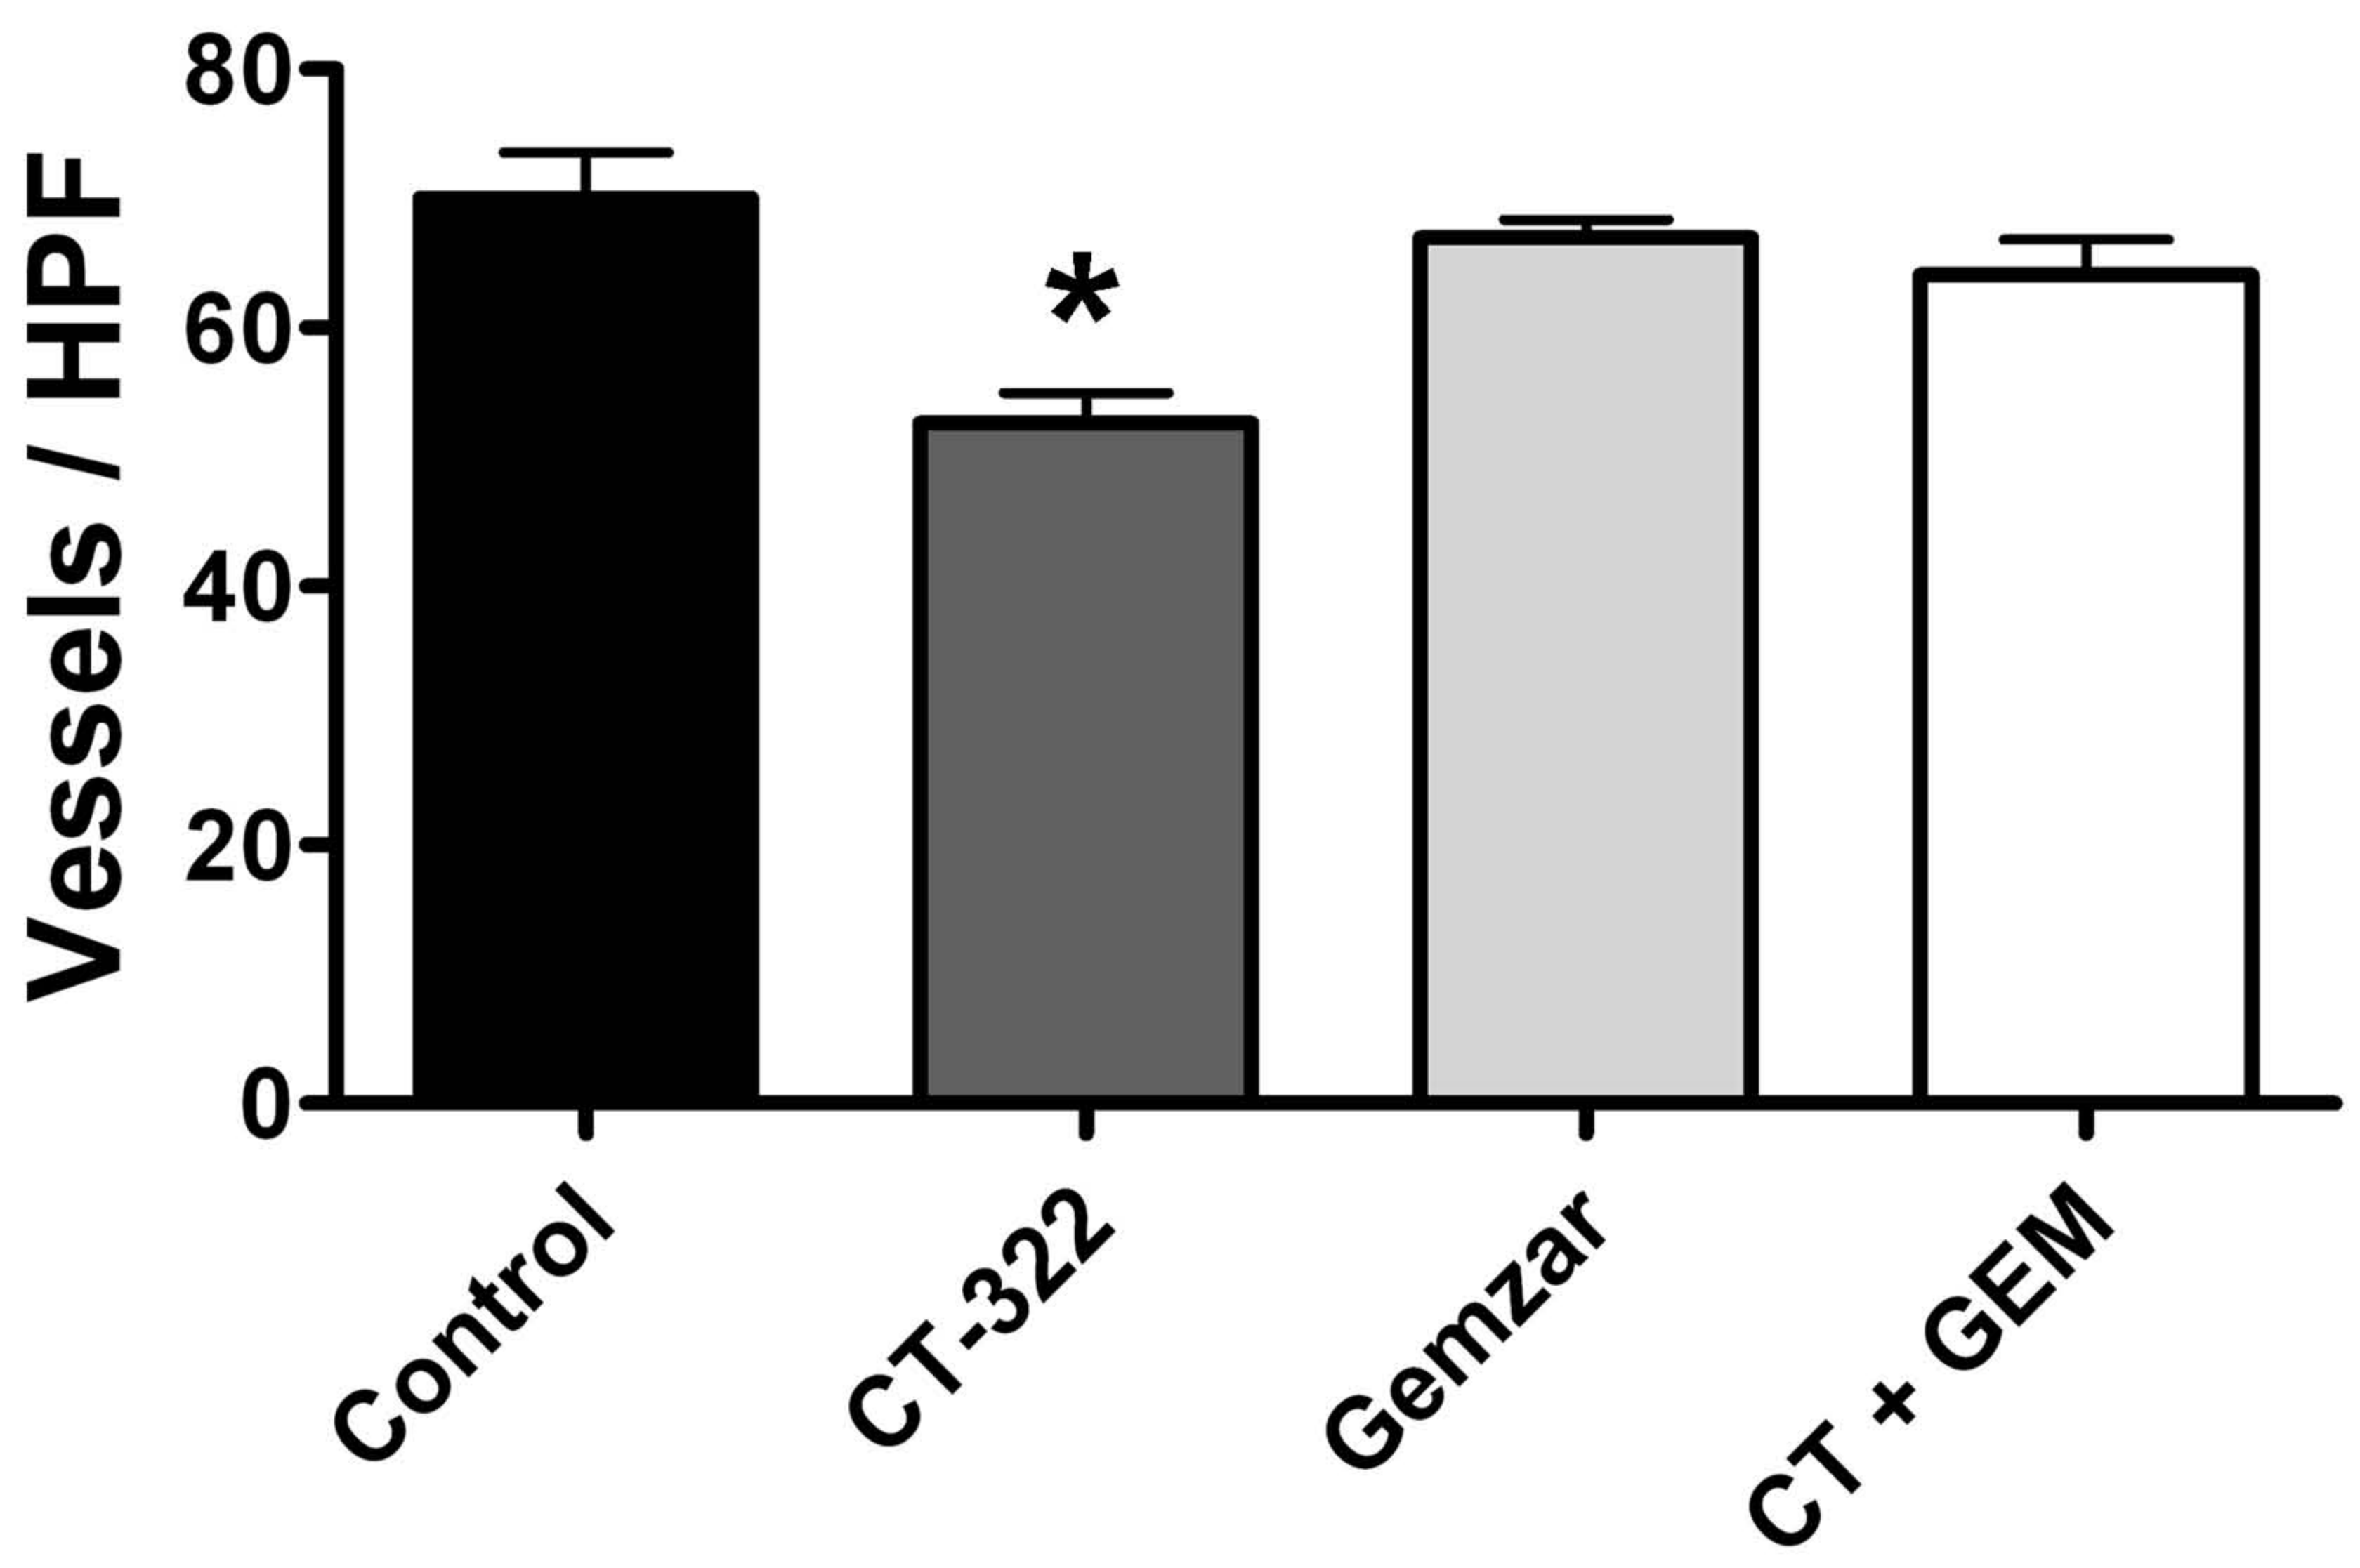

Supplement: MOESM4 [file 9471662]
